# Supplementary material for: Evaluation of Gene Association Methods for Coexpression Network Construction and Biological Knowledge Discovery
Source: PLoS One. 2012 Nov 30;7(11):e50411. doi: 10.1371/journal.pone.0050411 (PMC3511551; doi:10.1371/journal.pone.0050411)
Supplement: Table S1 — The selected pathways and pathway genes. (XLS) [file pone.0050411.s001.xls]

## Sheet: aracyc_pathways.20110406
Table S1. The selected pathways and pathway genes
AT1G30100	abscisic acid biosynthesis
AT1G52340	abscisic acid biosynthesis
AT1G67080	abscisic acid biosynthesis
AT1G78390	abscisic acid biosynthesis
AT2G27150	abscisic acid biosynthesis
AT2G44990	abscisic acid biosynthesis
AT3G14440	abscisic acid biosynthesis
AT3G24220	abscisic acid biosynthesis
AT3G63520	abscisic acid biosynthesis
AT2G29740	abscisic acid glucose ester biosynthesis
AT2G29750	abscisic acid glucose ester biosynthesis
AT2G30150	abscisic acid glucose ester biosynthesis
AT2G31750	abscisic acid glucose ester biosynthesis
AT3G02100	abscisic acid glucose ester biosynthesis
AT3G21760	abscisic acid glucose ester biosynthesis
AT3G21780	abscisic acid glucose ester biosynthesis
AT3G21790	abscisic acid glucose ester biosynthesis
AT3G21800	abscisic acid glucose ester biosynthesis
AT4G15260	abscisic acid glucose ester biosynthesis
AT4G15270	abscisic acid glucose ester biosynthesis
AT4G15280	abscisic acid glucose ester biosynthesis
AT4G15550	abscisic acid glucose ester biosynthesis
AT4G34135	abscisic acid glucose ester biosynthesis
AT4G34138	abscisic acid glucose ester biosynthesis
AT5G49690	abscisic acid glucose ester biosynthesis
AT1G08480	aerobic respiration -- electron donor III
AT1G32350	aerobic respiration -- electron donor III
AT1G47260	aerobic respiration -- electron donor III
AT1G47420	aerobic respiration -- electron donor III
AT1G79010	aerobic respiration -- electron donor III
AT2G02050	aerobic respiration -- electron donor III
AT2G18450	aerobic respiration -- electron donor III
AT2G20360	aerobic respiration -- electron donor III
AT2G27730	aerobic respiration -- electron donor III
AT2G31490	aerobic respiration -- electron donor III
AT2G33220	aerobic respiration -- electron donor III
AT2G42310	aerobic respiration -- electron donor III
AT2G46390	aerobic respiration -- electron donor III
AT2G46505	aerobic respiration -- electron donor III
AT2G47690	aerobic respiration -- electron donor III
AT3G03100	aerobic respiration -- electron donor III
AT3G08610	aerobic respiration -- electron donor III
AT3G12260	aerobic respiration -- electron donor III
AT3G22360	aerobic respiration -- electron donor III
AT3G22370	aerobic respiration -- electron donor III
AT3G27380	aerobic respiration -- electron donor III
AT3G27620	aerobic respiration -- electron donor III
AT3G47833	aerobic respiration -- electron donor III
AT3G57785	aerobic respiration -- electron donor III
AT4G02580	aerobic respiration -- electron donor III
AT4G16450	aerobic respiration -- electron donor III
AT4G20150	aerobic respiration -- electron donor III
AT5G08530	aerobic respiration -- electron donor III
AT5G11770	aerobic respiration -- electron donor III
AT5G37510	aerobic respiration -- electron donor III
AT5G40650	aerobic respiration -- electron donor III
AT5G52840	aerobic respiration -- electron donor III
AT5G62575	aerobic respiration -- electron donor III
AT5G63510	aerobic respiration -- electron donor III
AT5G64210	aerobic respiration -- electron donor III
AT5G66510	aerobic respiration -- electron donor III
AT5G66760	aerobic respiration -- electron donor III
AT5G67590	aerobic respiration -- electron donor III
AT5G08380	ajugose biosynthesis I (galactinol-dependent)
AT1G07890	ascorbate glutathione cycle
AT1G08065	ascorbate glutathione cycle
AT1G08080	ascorbate glutathione cycle
AT1G19570	ascorbate glutathione cycle
AT1G21850	ascorbate glutathione cycle
AT1G21860	ascorbate glutathione cycle
AT1G41830	ascorbate glutathione cycle
AT1G55560	ascorbate glutathione cycle
AT1G55570	ascorbate glutathione cycle
AT1G75270	ascorbate glutathione cycle
AT1G75790	ascorbate glutathione cycle
AT1G76160	ascorbate glutathione cycle
AT2G23630	ascorbate glutathione cycle
AT2G28210	ascorbate glutathione cycle
AT3G09640	ascorbate glutathione cycle
AT3G09940	ascorbate glutathione cycle
AT3G13390	ascorbate glutathione cycle
AT3G13400	ascorbate glutathione cycle
AT3G24170	ascorbate glutathione cycle
AT3G27820	ascorbate glutathione cycle
AT3G52880	ascorbate glutathione cycle
AT3G54660	ascorbate glutathione cycle
AT4G21000	ascorbate glutathione cycle
AT4G22010	ascorbate glutathione cycle
AT4G28090	ascorbate glutathione cycle
AT4G35000	ascorbate glutathione cycle
AT4G38420	ascorbate glutathione cycle
AT4G39830	ascorbate glutathione cycle
AT5G03630	ascorbate glutathione cycle
AT5G04180	ascorbate glutathione cycle
AT5G16710	ascorbate glutathione cycle
AT5G21100	ascorbate glutathione cycle
AT5G21105	ascorbate glutathione cycle
AT5G66920	ascorbate glutathione cycle
AT2G38050	brassinosteroid biosynthesis I
AT3G13730	brassinosteroid biosynthesis I
AT3G30180	brassinosteroid biosynthesis I
AT3G50660	brassinosteroid biosynthesis I
AT4G36380	brassinosteroid biosynthesis I
AT5G05690	brassinosteroid biosynthesis I
AT5G38970	brassinosteroid biosynthesis I
AT2G36750	cytokinins 7-<i>N</i>-glucoside biosynthesis
AT2G36800	cytokinins 7-<i>N</i>-glucoside biosynthesis
AT5G05870	cytokinins 7-<i>N</i>-glucoside biosynthesis
AT5G58600	cytokinins 7-<i>N</i>-glucoside biosynthesis
AT2G36750	cytokinins 9-<i>N</i>-glucoside biosynthesis
AT2G36800	cytokinins 9-<i>N</i>-glucoside biosynthesis
AT5G05870	cytokinins 9-<i>N</i>-glucoside biosynthesis
AT5G58600	cytokinins 9-<i>N</i>-glucoside biosynthesis
AT1G17010	flavonoid biosynthesis
AT1G17020	flavonoid biosynthesis
AT1G49390	flavonoid biosynthesis
AT1G51680	flavonoid biosynthesis
AT1G65060	flavonoid biosynthesis
AT1G78550	flavonoid biosynthesis
AT2G06960	flavonoid biosynthesis
AT2G36690	flavonoid biosynthesis
AT2G38240	flavonoid biosynthesis
AT3G11180	flavonoid biosynthesis
AT3G19000	flavonoid biosynthesis
AT3G19010	flavonoid biosynthesis
AT3G21230	flavonoid biosynthesis
AT3G21240	flavonoid biosynthesis
AT3G21420	flavonoid biosynthesis
AT3G51240	flavonoid biosynthesis
AT3G55120	flavonoid biosynthesis
AT3G55970	flavonoid biosynthesis
AT3G60290	flavonoid biosynthesis
AT4G10490	flavonoid biosynthesis
AT4G10500	flavonoid biosynthesis
AT4G16330	flavonoid biosynthesis
AT5G05600	flavonoid biosynthesis
AT5G07480	flavonoid biosynthesis
AT5G13930	flavonoid biosynthesis
AT5G20400	flavonoid biosynthesis
AT5G20550	flavonoid biosynthesis
AT5G24530	flavonoid biosynthesis
AT5G54000	flavonoid biosynthesis
AT5G66220	flavonoid biosynthesis
AT4G25310	flavonoid biosynthesis
AT1G15550	gibberellin biosynthesis I (non C-3, non C-13 hydroxylation)
AT1G44090	gibberellin biosynthesis I (non C-3, non C-13 hydroxylation)
AT1G60980	gibberellin biosynthesis I (non C-3, non C-13 hydroxylation)
AT1G80330	gibberellin biosynthesis I (non C-3, non C-13 hydroxylation)
AT1G80340	gibberellin biosynthesis I (non C-3, non C-13 hydroxylation)
AT4G25420	gibberellin biosynthesis I (non C-3, non C-13 hydroxylation)
AT5G07200	gibberellin biosynthesis I (non C-3, non C-13 hydroxylation)
AT5G51810	gibberellin biosynthesis I (non C-3, non C-13 hydroxylation)
AT1G02400	gibberellin inactivation
AT1G14120	gibberellin inactivation
AT1G14130	gibberellin inactivation
AT1G28030	gibberellin inactivation
AT1G30040	gibberellin inactivation
AT1G47990	gibberellin inactivation
AT1G50960	gibberellin inactivation
AT1G78440	gibberellin inactivation
AT2G34555	gibberellin inactivation
AT3G46500	gibberellin inactivation
AT4G03070	gibberellin inactivation
AT4G21200	gibberellin inactivation
AT5G58660	gibberellin inactivation
AT1G09780	gluconeogenesis
AT1G12900	gluconeogenesis
AT1G13440	gluconeogenesis
AT1G18270	gluconeogenesis
AT1G22170	gluconeogenesis
AT1G32060	gluconeogenesis
AT1G42970	gluconeogenesis
AT1G43670	gluconeogenesis
AT1G56190	gluconeogenesis
AT1G74030	gluconeogenesis
AT1G79530	gluconeogenesis
AT1G79550	gluconeogenesis
AT2G01140	gluconeogenesis
AT2G21330	gluconeogenesis
AT2G29560	gluconeogenesis
AT2G36460	gluconeogenesis
AT2G36530	gluconeogenesis
AT3G04120	gluconeogenesis
AT3G08590	gluconeogenesis
AT3G12780	gluconeogenesis
AT3G26650	gluconeogenesis
AT3G52930	gluconeogenesis
AT3G54050	gluconeogenesis
AT3G62410	gluconeogenesis
AT4G24620	gluconeogenesis
AT4G26520	gluconeogenesis
AT4G26530	gluconeogenesis
AT4G37870	gluconeogenesis
AT4G38970	gluconeogenesis
AT5G03690	gluconeogenesis
AT5G42740	gluconeogenesis
AT5G64380	gluconeogenesis
AT1G48470	glutamine biosynthesis III
AT1G53310	glutamine biosynthesis III
AT1G54340	glutamine biosynthesis III
AT1G65930	glutamine biosynthesis III
AT1G66200	glutamine biosynthesis III
AT2G05710	glutamine biosynthesis III
AT2G17130	glutamine biosynthesis III
AT2G42600	glutamine biosynthesis III
AT2G42790	glutamine biosynthesis III
AT2G44350	glutamine biosynthesis III
AT3G09810	glutamine biosynthesis III
AT3G14940	glutamine biosynthesis III
AT3G17820	glutamine biosynthesis III
AT3G58740	glutamine biosynthesis III
AT3G58750	glutamine biosynthesis III
AT3G60100	glutamine biosynthesis III
AT4G15530	glutamine biosynthesis III
AT4G26970	glutamine biosynthesis III
AT4G35260	glutamine biosynthesis III
AT4G35650	glutamine biosynthesis III
AT4G35830	glutamine biosynthesis III
AT5G03290	glutamine biosynthesis III
AT5G04140	glutamine biosynthesis III
AT5G14590	glutamine biosynthesis III
AT5G16570	glutamine biosynthesis III
AT5G35630	glutamine biosynthesis III
AT5G37600	glutamine biosynthesis III
AT1G09780	glycolysis I (plastidic)
AT1G12900	glycolysis I (plastidic)
AT1G13440	glycolysis I (plastidic)
AT1G18270	glycolysis I (plastidic)
AT1G22170	glycolysis I (plastidic)
AT1G32060	glycolysis I (plastidic)
AT1G32440	glycolysis I (plastidic)
AT1G42970	glycolysis I (plastidic)
AT1G43670	glycolysis I (plastidic)
AT1G56190	glycolysis I (plastidic)
AT1G74030	glycolysis I (plastidic)
AT1G79530	glycolysis I (plastidic)
AT1G79550	glycolysis I (plastidic)
AT2G01140	glycolysis I (plastidic)
AT2G21170	glycolysis I (plastidic)
AT2G21330	glycolysis I (plastidic)
AT2G22480	glycolysis I (plastidic)
AT2G29560	glycolysis I (plastidic)
AT2G36460	glycolysis I (plastidic)
AT2G36530	glycolysis I (plastidic)
AT3G04050	glycolysis I (plastidic)
AT3G04120	glycolysis I (plastidic)
AT3G08590	glycolysis I (plastidic)
AT3G12780	glycolysis I (plastidic)
AT3G22960	glycolysis I (plastidic)
AT3G25960	glycolysis I (plastidic)
AT3G26650	glycolysis I (plastidic)
AT3G52930	glycolysis I (plastidic)
AT3G52990	glycolysis I (plastidic)
AT3G54050	glycolysis I (plastidic)
AT3G55440	glycolysis I (plastidic)
AT3G55810	glycolysis I (plastidic)
AT3G62410	glycolysis I (plastidic)
AT4G24620	glycolysis I (plastidic)
AT4G26270	glycolysis I (plastidic)
AT4G26390	glycolysis I (plastidic)
AT4G26520	glycolysis I (plastidic)
AT4G26530	glycolysis I (plastidic)
AT4G29220	glycolysis I (plastidic)
AT4G32840	glycolysis I (plastidic)
AT4G38970	glycolysis I (plastidic)
AT5G03690	glycolysis I (plastidic)
AT5G08570	glycolysis I (plastidic)
AT5G42740	glycolysis I (plastidic)
AT5G47810	glycolysis I (plastidic)
AT5G52920	glycolysis I (plastidic)
AT5G56350	glycolysis I (plastidic)
AT5G56630	glycolysis I (plastidic)
AT5G61580	glycolysis I (plastidic)
AT5G63680	glycolysis I (plastidic)
AT5G64380	glycolysis I (plastidic)
AT1G09780	glycolysis IV (plant cytosol)
AT1G12000	glycolysis IV (plant cytosol)
AT1G12900	glycolysis IV (plant cytosol)
AT1G13440	glycolysis IV (plant cytosol)
AT1G18270	glycolysis IV (plant cytosol)
AT1G20950	glycolysis IV (plant cytosol)
AT1G22170	glycolysis IV (plant cytosol)
AT1G32060	glycolysis IV (plant cytosol)
AT1G32440	glycolysis IV (plant cytosol)
AT1G42970	glycolysis IV (plant cytosol)
AT1G56190	glycolysis IV (plant cytosol)
AT1G74030	glycolysis IV (plant cytosol)
AT1G76550	glycolysis IV (plant cytosol)
AT1G79530	glycolysis IV (plant cytosol)
AT1G79550	glycolysis IV (plant cytosol)
AT2G01140	glycolysis IV (plant cytosol)
AT2G21170	glycolysis IV (plant cytosol)
AT2G21330	glycolysis IV (plant cytosol)
AT2G22480	glycolysis IV (plant cytosol)
AT2G24270	glycolysis IV (plant cytosol)
AT2G29560	glycolysis IV (plant cytosol)
AT2G36460	glycolysis IV (plant cytosol)
AT2G36530	glycolysis IV (plant cytosol)
AT3G04050	glycolysis IV (plant cytosol)
AT3G04120	glycolysis IV (plant cytosol)
AT3G08590	glycolysis IV (plant cytosol)
AT3G12780	glycolysis IV (plant cytosol)
AT3G22960	glycolysis IV (plant cytosol)
AT3G25960	glycolysis IV (plant cytosol)
AT3G26650	glycolysis IV (plant cytosol)
AT3G52930	glycolysis IV (plant cytosol)
AT3G52990	glycolysis IV (plant cytosol)
AT3G55440	glycolysis IV (plant cytosol)
AT3G55810	glycolysis IV (plant cytosol)
AT3G62410	glycolysis IV (plant cytosol)
AT4G04040	glycolysis IV (plant cytosol)
AT4G26270	glycolysis IV (plant cytosol)
AT4G26390	glycolysis IV (plant cytosol)
AT4G26520	glycolysis IV (plant cytosol)
AT4G26530	glycolysis IV (plant cytosol)
AT4G29220	glycolysis IV (plant cytosol)
AT4G32840	glycolysis IV (plant cytosol)
AT4G38970	glycolysis IV (plant cytosol)
AT5G03690	glycolysis IV (plant cytosol)
AT5G08570	glycolysis IV (plant cytosol)
AT5G47810	glycolysis IV (plant cytosol)
AT5G52920	glycolysis IV (plant cytosol)
AT5G56350	glycolysis IV (plant cytosol)
AT5G56630	glycolysis IV (plant cytosol)
AT5G61580	glycolysis IV (plant cytosol)
AT5G63680	glycolysis IV (plant cytosol)
AT1G04410	glyoxylate cycle
AT1G21440	glyoxylate cycle
AT1G53240	glyoxylate cycle
AT2G05710	glyoxylate cycle
AT2G22780	glyoxylate cycle
AT2G42790	glyoxylate cycle
AT2G43180	glyoxylate cycle
AT2G44350	glyoxylate cycle
AT3G15020	glyoxylate cycle
AT3G21720	glyoxylate cycle
AT3G47520	glyoxylate cycle
AT3G58740	glyoxylate cycle
AT3G58750	glyoxylate cycle
AT3G60100	glyoxylate cycle
AT4G26970	glyoxylate cycle
AT4G35830	glyoxylate cycle
AT5G03860	glyoxylate cycle
AT5G09660	glyoxylate cycle
AT5G43330	glyoxylate cycle
AT5G56720	glyoxylate cycle
AT1G04180	IAA biosynthesis I
AT1G04610	IAA biosynthesis I
AT1G08980	IAA biosynthesis I
AT1G11610	IAA biosynthesis I
AT1G23320	IAA biosynthesis I
AT1G70560	IAA biosynthesis I
AT2G22330	IAA biosynthesis I
AT2G27150	IAA biosynthesis I
AT2G30750	IAA biosynthesis I
AT2G30770	IAA biosynthesis I
AT3G44310	IAA biosynthesis I
AT3G44320	IAA biosynthesis I
AT4G13260	IAA biosynthesis I
AT4G13310	IAA biosynthesis I
AT4G32540	IAA biosynthesis I
AT4G39950	IAA biosynthesis I
AT5G07360	IAA biosynthesis I
AT5G11320	IAA biosynthesis I
AT5G20960	IAA biosynthesis I
AT5G22300	IAA biosynthesis I
AT5G24950	IAA biosynthesis I
AT5G24960	IAA biosynthesis I
AT5G42590	IAA biosynthesis I
AT5G43890	IAA biosynthesis I
AT1G28130	indole-3-acetyl-amino acid biosynthesis
AT2G23170	indole-3-acetyl-amino acid biosynthesis
AT4G27260	indole-3-acetyl-amino acid biosynthesis
AT4G37390	indole-3-acetyl-amino acid biosynthesis
AT5G54510	indole-3-acetyl-amino acid biosynthesis
AT1G04710	jasmonic acid biosynthesis
AT1G13280	jasmonic acid biosynthesis
AT1G17420	jasmonic acid biosynthesis
AT1G20510	jasmonic acid biosynthesis
AT1G55020	jasmonic acid biosynthesis
AT1G67560	jasmonic acid biosynthesis
AT1G72520	jasmonic acid biosynthesis
AT2G06050	jasmonic acid biosynthesis
AT2G33150	jasmonic acid biosynthesis
AT2G35690	jasmonic acid biosynthesis
AT3G22400	jasmonic acid biosynthesis
AT3G25770	jasmonic acid biosynthesis
AT3G25780	jasmonic acid biosynthesis
AT3G45140	jasmonic acid biosynthesis
AT4G16760	jasmonic acid biosynthesis
AT4G29010	jasmonic acid biosynthesis
AT5G42650	jasmonic acid biosynthesis
AT5G48880	jasmonic acid biosynthesis
AT1G17010	leucodelphinidin biosynthesis
AT1G17020	leucodelphinidin biosynthesis
AT1G49390	leucodelphinidin biosynthesis
AT1G78550	leucodelphinidin biosynthesis
AT2G06960	leucodelphinidin biosynthesis
AT2G36690	leucodelphinidin biosynthesis
AT2G38240	leucodelphinidin biosynthesis
AT2G45560	leucodelphinidin biosynthesis
AT3G11180	leucodelphinidin biosynthesis
AT3G19000	leucodelphinidin biosynthesis
AT3G19010	leucodelphinidin biosynthesis
AT3G21420	leucodelphinidin biosynthesis
AT3G51240	leucodelphinidin biosynthesis
AT3G55970	leucodelphinidin biosynthesis
AT3G60290	leucodelphinidin biosynthesis
AT3G61880	leucodelphinidin biosynthesis
AT4G10490	leucodelphinidin biosynthesis
AT4G10500	leucodelphinidin biosynthesis
AT4G16330	leucodelphinidin biosynthesis
AT4G25310	leucodelphinidin biosynthesis
AT4G27250	leucodelphinidin biosynthesis
AT5G05600	leucodelphinidin biosynthesis
AT5G07480	leucodelphinidin biosynthesis
AT5G07990	leucodelphinidin biosynthesis
AT5G20400	leucodelphinidin biosynthesis
AT5G20550	leucodelphinidin biosynthesis
AT5G24530	leucodelphinidin biosynthesis
AT5G42800	leucodelphinidin biosynthesis
AT5G54000	leucodelphinidin biosynthesis
AT1G22430	oxidative ethanol degradation I
AT1G08510	palmitate biosynthesis II (bacteria and plants)
AT1G24360	palmitate biosynthesis II (bacteria and plants)
AT1G74960	palmitate biosynthesis II (bacteria and plants)
AT2G04540	palmitate biosynthesis II (bacteria and plants)
AT2G22230	palmitate biosynthesis II (bacteria and plants)
AT3G25110	palmitate biosynthesis II (bacteria and plants)
AT5G46290	palmitate biosynthesis II (bacteria and plants)
AT1G15950	phenylpropanoid biosynthesis
AT1G24735	phenylpropanoid biosynthesis
AT1G51680	phenylpropanoid biosynthesis
AT1G65060	phenylpropanoid biosynthesis
AT1G67980	phenylpropanoid biosynthesis
AT1G67990	phenylpropanoid biosynthesis
AT1G80820	phenylpropanoid biosynthesis
AT2G40890	phenylpropanoid biosynthesis
AT3G19450	phenylpropanoid biosynthesis
AT3G21230	phenylpropanoid biosynthesis
AT3G21240	phenylpropanoid biosynthesis
AT3G48720	phenylpropanoid biosynthesis
AT4G26220	phenylpropanoid biosynthesis
AT4G34050	phenylpropanoid biosynthesis
AT4G34230	phenylpropanoid biosynthesis
AT4G36220	phenylpropanoid biosynthesis
AT5G04330	phenylpropanoid biosynthesis
AT5G41040	phenylpropanoid biosynthesis
AT5G48930	phenylpropanoid biosynthesis
AT5G63560	phenylpropanoid biosynthesis
AT1G01420	quercetin glucoside biosynthesis (Arabidopsis)
AT1G06000	quercetin glucoside biosynthesis (Arabidopsis)
AT1G30530	quercetin glucoside biosynthesis (Arabidopsis)
AT1G50580	quercetin glucoside biosynthesis (Arabidopsis)
AT1G64910	quercetin glucoside biosynthesis (Arabidopsis)
AT1G64920	quercetin glucoside biosynthesis (Arabidopsis)
AT2G15480	quercetin glucoside biosynthesis (Arabidopsis)
AT2G15490	quercetin glucoside biosynthesis (Arabidopsis)
AT2G22930	quercetin glucoside biosynthesis (Arabidopsis)
AT2G26480	quercetin glucoside biosynthesis (Arabidopsis)
AT2G29740	quercetin glucoside biosynthesis (Arabidopsis)
AT2G29750	quercetin glucoside biosynthesis (Arabidopsis)
AT2G36800	quercetin glucoside biosynthesis (Arabidopsis)
AT2G43840	quercetin glucoside biosynthesis (Arabidopsis)
AT3G16520	quercetin glucoside biosynthesis (Arabidopsis)
AT3G21750	quercetin glucoside biosynthesis (Arabidopsis)
AT3G21800	quercetin glucoside biosynthesis (Arabidopsis)
AT3G29630	quercetin glucoside biosynthesis (Arabidopsis)
AT3G46660	quercetin glucoside biosynthesis (Arabidopsis)
AT3G46670	quercetin glucoside biosynthesis (Arabidopsis)
AT4G01070	quercetin glucoside biosynthesis (Arabidopsis)
AT4G09500	quercetin glucoside biosynthesis (Arabidopsis)
AT4G15280	quercetin glucoside biosynthesis (Arabidopsis)
AT4G27570	quercetin glucoside biosynthesis (Arabidopsis)
AT4G34135	quercetin glucoside biosynthesis (Arabidopsis)
AT4G34138	quercetin glucoside biosynthesis (Arabidopsis)
AT5G17030	quercetin glucoside biosynthesis (Arabidopsis)
AT5G17050	quercetin glucoside biosynthesis (Arabidopsis)
AT5G53990	quercetin glucoside biosynthesis (Arabidopsis)
AT5G54010	quercetin glucoside biosynthesis (Arabidopsis)
AT5G54060	quercetin glucoside biosynthesis (Arabidopsis)
AT5G59580	quercetin glucoside biosynthesis (Arabidopsis)
AT5G59590	quercetin glucoside biosynthesis (Arabidopsis)
AT1G16980	trehalose biosynthesis I
AT1G17000	trehalose biosynthesis I
AT1G22210	trehalose biosynthesis I
AT1G23870	trehalose biosynthesis I
AT1G35910	trehalose biosynthesis I
AT1G60140	trehalose biosynthesis I
AT1G68020	trehalose biosynthesis I
AT1G78090	trehalose biosynthesis I
AT1G78580	trehalose biosynthesis I
AT2G18700	trehalose biosynthesis I
AT2G22190	trehalose biosynthesis I
AT2G25870	trehalose biosynthesis I
AT4G12430	trehalose biosynthesis I
AT4G17770	trehalose biosynthesis I
AT4G22590	trehalose biosynthesis I
AT4G27550	trehalose biosynthesis I
AT4G39770	trehalose biosynthesis I
AT5G10100	trehalose biosynthesis I
AT5G51460	trehalose biosynthesis I
AT5G65140	trehalose biosynthesis I
AT2G04400	tryptophan biosynthesis
AT2G28880	tryptophan biosynthesis
AT2G29690	tryptophan biosynthesis
AT3G54640	tryptophan biosynthesis
AT3G55870	tryptophan biosynthesis
AT4G02610	tryptophan biosynthesis
AT5G05590	tryptophan biosynthesis
AT5G05730	tryptophan biosynthesis
AT5G17990	tryptophan biosynthesis
AT5G48220	tryptophan biosynthesis
AT5G54810	tryptophan biosynthesis
AT5G57890	tryptophan biosynthesis
AT1G22430	UDP-D-xylose biosynthesis
AT1G22440	UDP-D-xylose biosynthesis
AT1G26570	UDP-D-xylose biosynthesis
AT1G32780	UDP-D-xylose biosynthesis
AT1G64710	UDP-D-xylose biosynthesis
AT1G77120	UDP-D-xylose biosynthesis
AT2G27860	UDP-D-xylose biosynthesis
AT2G28760	UDP-D-xylose biosynthesis
AT3G29360	UDP-D-xylose biosynthesis
AT3G46440	UDP-D-xylose biosynthesis
AT3G53520	UDP-D-xylose biosynthesis
AT3G62830	UDP-D-xylose biosynthesis
AT4G22110	UDP-D-xylose biosynthesis
AT5G15490	UDP-D-xylose biosynthesis
AT5G24760	UDP-D-xylose biosynthesis
AT5G39320	UDP-D-xylose biosynthesis
AT5G42250	UDP-D-xylose biosynthesis
AT5G59290	UDP-D-xylose biosynthesis
AT1G12780	UDP-galactose biosynthesis
AT1G63180	UDP-galactose biosynthesis
AT1G64440	UDP-galactose biosynthesis
AT4G10960	UDP-galactose biosynthesis
AT4G23920	UDP-galactose biosynthesis
AT1G01050	UDP-glucose biosynthesis (from glucose 6-phosphate)
AT1G15690	UDP-glucose biosynthesis (from glucose 6-phosphate)
AT1G16780	UDP-glucose biosynthesis (from glucose 6-phosphate)
AT1G23190	UDP-glucose biosynthesis (from glucose 6-phosphate)
AT1G70730	UDP-glucose biosynthesis (from glucose 6-phosphate)
AT1G78920	UDP-glucose biosynthesis (from glucose 6-phosphate)
AT2G18230	UDP-glucose biosynthesis (from glucose 6-phosphate)
AT2G35020	UDP-glucose biosynthesis (from glucose 6-phosphate)
AT2G46860	UDP-glucose biosynthesis (from glucose 6-phosphate)
AT3G03250	UDP-glucose biosynthesis (from glucose 6-phosphate)
AT3G53620	UDP-glucose biosynthesis (from glucose 6-phosphate)
AT4G01480	UDP-glucose biosynthesis (from glucose 6-phosphate)
AT5G09650	UDP-glucose biosynthesis (from glucose 6-phosphate)
AT5G17310	UDP-glucose biosynthesis (from glucose 6-phosphate)
AT5G18070	UDP-glucose biosynthesis (from glucose 6-phosphate)
AT5G51820	UDP-glucose biosynthesis (from glucose 6-phosphate)
AT5G52560	UDP-glucose biosynthesis (from glucose 6-phosphate)
AT1G01120	very long chain fatty acid biosynthesis
AT1G04220	very long chain fatty acid biosynthesis
AT1G19440	very long chain fatty acid biosynthesis
AT1G25450	very long chain fatty acid biosynthesis
AT1G67730	very long chain fatty acid biosynthesis
AT1G68530	very long chain fatty acid biosynthesis
AT1G76150	very long chain fatty acid biosynthesis
AT2G15090	very long chain fatty acid biosynthesis
AT2G16280	very long chain fatty acid biosynthesis
AT2G26640	very long chain fatty acid biosynthesis
AT3G06860	very long chain fatty acid biosynthesis
AT3G10280	very long chain fatty acid biosynthesis
AT3G55360	very long chain fatty acid biosynthesis
AT4G16210	very long chain fatty acid biosynthesis
AT4G16800	very long chain fatty acid biosynthesis
AT4G29010	very long chain fatty acid biosynthesis
AT4G34250	very long chain fatty acid biosynthesis
AT4G34510	very long chain fatty acid biosynthesis
AT4G34520	very long chain fatty acid biosynthesis
AT5G10480	very long chain fatty acid biosynthesis
AT5G43760	very long chain fatty acid biosynthesis
