# Supplementary material for: Evaluation of Gene Association Methods for Coexpression Network Construction and Biological Knowledge Discovery
Source: PLoS One. 2012 Nov 30;7(11):e50411. doi: 10.1371/journal.pone.0050411 (PMC3511551; doi:10.1371/journal.pone.0050411)
Supplement: Table S2 — Sensitivity, specificity, and predicted accuracy of eight gene association methods for pathway analysis. (XLS) [file pone.0050411.s002.xls]

## Sheet: top_result-3.txt
Table S2. Sensitivity, specificity, and predicted accuracy of eight gene association methods
1. Top 100 genes compared to genes in Slice 1 (top101~1000), Slice 2 (mid 1-900) and Slice 3 (bottom 1-900) from sorted gene list with most coexpressed gene located at the top. The numbers of positive genes from thhree slices containing 900 genes were divided by 9 before they were compared to top 100
Same pathway ( genes in the same pathway are counted as positives)	TP_top1-100	FP_top1~100	TN_top101~900 (Avg/100)	FN_top101-1000 (Avg/100)	Sensitivity=(TP/TP+FN)x100%	Specificity (TN/(FP+TN)*100%	Predicted accuracy (TP+TN)/(TP+FP+TN+FN)*100		TP_top1-100	FP_top1~100	TN-mid1~900( avg/100)	FN-mid1-900 (Avg/100)	Sensitivity=(TP/TP+FN)x100%	Specificity (TN/(FP+TN)*100%	Predicted accuracy (TP+TN)/(TP+FP+TN+FN)*100		TP_top1-100	FP_top1~100	TN-bottom1~900(Avg/100)	FN-bottom1~900 (Avg per 100)	Sensitivity=(TP/TP+FN)x100%	Specificity (TN/(FP+TN)*100%	Predicted accuracy (TP+TN)/(TP+FP+TN+FN)*100
dist.corr	8	92	93.3	6.7	54.4218	50.3508	50.65		8	92	99.9	0.1	98.7654	52.0584	53.95		8	92	100	0	100	52.0833	54
hoeffd	18	82	91.3	8.7	67.4157	52.6832	54.65		18	82	100	0	100	54.9451	59		18	82	100	0	100	54.9451	59
kendall	16	84	89.9	10.1	61.3027	51.6964	52.95		16	84	100	0	100	54.3478	58		16	84	100	0	100	54.3478	58
pearson	6	94	96.9	3.1	65.9341	50.7596	51.45		6	94	99.8	0.2	96.7742	51.4964	52.9		6	94	100	0	100	51.5464	53
rank.theil	6	94	95.3	4.7	56.0748	50.3434	50.65		6	94	99.9	0.1	98.3607	51.5214	52.95		6	94	100	0	100	51.5464	53
spearman	15	85	90.8	9.2	61.9835	51.6496	52.9		15	85	100	0	100	54.0541	57.5		15	85	100	0	100	54.0541	57.5
theil.sen	2	98	97.6	2.4	45.4545	49.8978	49.8		2	98	99.9	0.1	95.2381	50.48	50.95		2	98	100	0	100	50.5051	51
wt.rank.corr	12	88	91.8	8.2	59.4059	51.0567	51.9		12	88	100	0	100	53.1915	56		12	88	100	0	100	53.1915	56
different pathways ( ( genes in the different pathway are counted as positives)	TP_top1-100	FP_top1~100	TN_top101~900 (Avg/100)	FN_top101-1000 (Avg/100)	Sensitivity=(TP/TP+FN)x100%	Specificity (TN/(FP+TN)*100%	Predicted accuracy (TP+TN)/(TP+FP+TN+FN)*100		TP_top1-100	FP_top1~100	TN-mid1~900( avg/100)	FN-mid1-900 (Avg/100)	Sensitivity=(TP/TP+FN)x100%	Specificity (TN/(FP+TN)*100%	Predicted accuracy (TP+TN)/(TP+FP+TN+FN)*100		TP_top1-100	FP_top1~100	TN-bottom1~900(Avg/100)	FN-bottom1~900 (Avg per 100)	Sensitivity=(TP/TP+FN)x100%	Specificity (TN/(FP+TN)*100%	Predicted accuracy (TP+TN)/(TP+FP+TN+FN)*100
dist.corr	0	100	94.9	5.1	0	48.6916	47.45		0	100	98.2	1.8	0	49.5459	49.1		0	100	98.3	1.7	0	49.5714	49.15
hoeffd	4	96	95.6	4.4	47.619	49.8956	49.8		4	96	98.2	1.8	68.9655	50.5664	51.1		4	96	99.2	0.8	83.3333	50.8197	51.6
kendall	6	94	94.7	5.3	53.0973	50.1855	50.35		6	94	97.8	2.2	73.1707	50.9906	51.9		6	94	98.2	1.8	76.9231	51.0926	52.1
pearson	2	98	97.6	2.4	45.4545	49.8978	49.8		2	98	97.7	2.3	46.5116	49.9234	49.85		2	98	98.2	1.8	52.6316	50.051	50.1
rank.theil	5	95	95.9	4.1	54.9451	50.2357	50.45		5	95	98.9	1.1	81.9672	51.0057	51.95		5	95	97.3	2.7	64.9351	50.598	51.15
spearman	6	94	95.1	4.9	55.0459	50.2909	50.55		6	94	97.6	2.4	71.4286	50.9395	51.8		6	94	98.2	1.8	76.9231	51.0926	52.1
theil.sen	4	96	96.3	3.7	51.9481	50.078	50.15		4	96	98.4	1.6	71.4286	50.6173	51.2		4	96	98.4	1.6	71.4286	50.6173	51.2
wt.rank.corr	4	96	95.1	4.9	44.9438	49.7645	49.55		4	96	97.6	2.4	62.5	50.4132	50.8		4	96	98.6	1.4	74.0741	50.668	51.3
2. Top 500 genes compared to genes in Slice 1 (top501~1000), Slice 2 (mid 1-500) and Slice 3 (bottom 1-500) from sorted gene list with most coexpressed gene located. Top 500 genes can compare to other slices directly because they have the same numbers of genes
Same pathway ( genes in the same pathway are counted as positives)	TP_top1-500	FP_top1-500	TN501~1000 (Average)	FN501~1000 (Average)	Sensitivity=(TP/TP+FN)x100%	Specificity (TN/(FP+TN)*100%	Predicted accuracy (TP+TN)/(TP+FP+TN+FN)*100		TP_top1-500	FP_top1-500	TN-mid1-500	FN_mid1~500	Sensitivity=(TP/TP+FN)x100%	Specificity (TN/(FP+TN)*100%	Predicted accuracy (TP+TN)/(TP+FP+TN+FN)*100		TP_top1-500	FP_top1-500	TN-bottom1-500	FN_bottom1-500	Sensitivity=(TP/TP+FN)x100%	Specificity (TN/(FP+TN)*100%	Predicted accuracy (TP+TN)/(TP+FP+TN+FN)*100
dist.corr	50	450	482	18	73.5294	51.7167	53.2		50	450	499	1	98.0392	52.5817	54.9		50	450	500	0	100	52.6316	55
hoeffd	65	435	469	31	67.7083	51.8805	53.4		65	435	500	0	100	53.4759	56.5		65	435	500	0	100	53.4759	56.5
kendall	62	438	455	45	57.9439	50.9518	51.7		62	438	500	0	100	53.3049	56.2		62	438	500	0	100	53.3049	56.2
pearson	30	470	496	4	88.2353	51.3458	52.6		30	470	498	2	93.75	51.4463	52.8		30	470	500	0	100	51.5464	53
rank.theil	30	470	482	18	62.5	50.6303	51.2		30	470	499	1	96.7742	51.4964	52.9		30	470	500	0	100	51.5464	53
spearman	64	436	466	34	65.3061	51.663	53		64	436	500	0	100	53.4188	56.4		64	436	500	0	100	53.4188	56.4
theil.sen	11	489	487	13	45.8333	49.8975	49.8		11	489	500	0	100	50.5561	51.1		11	489	499	1	91.6667	50.5061	51
wt.rank.corr	52	448	466	34	60.4651	50.9847	51.8		52	448	500	0	100	52.7426	55.2		52	448	500	0	100	52.7426	55.2
different pathways ( ( genes in the different pathway are counted as positives)	TP_top1-500	FP_top1-500	TN501~1000 (Average)	FN501~1000 (Average)	Sensitivity=(TP/TP+FN)x100%	Specificity (TN/(FP+TN)*100%	Predicted accuracy (TP+TN)/(TP+FP+TN+FN)*100		TP_top1-500	FP_top1-500	TN-mid1-500	FN_mid1-500	Sensitivity=(TP/TP+FN)x100%	Specificity (TN/(FP+TN)*100%	Predicted accuracy (TP+TN)/(TP+FP+TN+FN)*100		TP_top1-500	FP_top1-500	TN-bottom1-500	FN_bottom1-500	Sensitivity=(TP/TP+FN)x100%	Specificity (TN/(FP+TN)*100%	Predicted accuracy (TP+TN)/(TP+FP+TN+FN)*100
dist.corr	20	480	474	26	43.4783	49.6855	49.4		20	480	493	7	74.0741	50.668	51.3		20	480	491	9	68.9655	50.5664	51.1
hoeffd	26	474	482	18	59.0909	50.4184	50.8		26	474	490	10	72.2222	50.8299	51.6		26	474	497	3	89.6552	51.1843	52.3
kendall	26	474	472	28	48.1481	49.8943	49.8		26	474	490	10	72.2222	50.8299	51.6		26	474	490	10	72.2222	50.8299	51.6
pearson	14	486	490	10	58.3333	50.2049	50.4		14	486	489	11	56	50.1538	50.3		14	486	492	8	63.6364	50.3067	50.6
rank.theil	20	480	478	22	47.619	49.8956	49.8		20	480	492	8	71.4286	50.6173	51.2		20	480	487	13	60.6061	50.3619	50.7
spearman	22	478	472	28	44	49.6842	49.4		22	478	486	14	61.1111	50.4149	50.8		22	478	486	14	61.1111	50.4149	50.8
theil.sen	20	480	483	17	54.0541	50.1558	50.3		20	480	492	8	71.4286	50.6173	51.2		20	480	496	4	83.3333	50.8197	51.6
wt.rank.corr	24	476	476	24	50	50	50		24	476	492	8	75	50.8264	51.6		24	476	490	10	70.5882	50.7246	51.4
Note : TP---True Positive TN--- True Negative FP---- False Positive FN-----false negative
top---top genes of sorted list, mid---middle slice of sorted gene list, bottom---bottom slice of sorted list
