# Supplementary material for: Evaluation of Gene Association Methods for Coexpression Network Construction and Biological Knowledge Discovery
Source: PLoS One. 2012 Nov 30;7(11):e50411. doi: 10.1371/journal.pone.0050411 (PMC3511551; doi:10.1371/journal.pone.0050411)
Supplement: Table S3 — Positive gene lists for coexpression network construction and decomposition via TF-Cluster. (PDF) [file pone.0050411.s003.pdf]

**Table S3.** Positive gene lists for coexpression network construction and decomposition via TF-Cluster (Nie et al. *BMC Systems Biology* 2011, **5**:53)

Original Table 1: TF cluster identified with pluripotency of human embryonic stem cells

| Genes                                                                                                         | Symbol    | Description                                                      | Evidence                                                      |
|---------------------------------------------------------------------------------------------------------------|-----------|------------------------------------------------------------------|---------------------------------------------------------------|
| <b>Cluster 1: A cluster of TFs control pluripotency renewal of human stem cells</b>                           |           |                                                                  |                                                               |
| NM_024865                                                                                                     | NANOG     | Nanog homeobox                                                   | (BOYER <i>et al.</i> 2005)                                    |
| BC099704                                                                                                      | NANOGP8   | Nanog homeobox pseudogene 8                                      | Pseudogene with similarity to Nanog.                          |
| NM_003106                                                                                                     | SOX2      | SRY box 2                                                        | (BOYER <i>et al.</i> 2005)                                    |
| NM_002701                                                                                                     | POU5F1    | POU class 5 homeobox 1                                           | (BOYER <i>et al.</i> 2005)                                    |
| NM_006892                                                                                                     | DNMT3B    | DNS methyltransferase 3 beta                                     | (AASEN <i>et al.</i> 2008; GOPALAKRISHNAN <i>et al.</i> 2009) |
| NM_080618                                                                                                     | CTCF      | CCCTC-binding factor-like                                        | (MONK <i>et al.</i> 2008)                                     |
| NM_016089                                                                                                     | ZNF589    | Zinc finger 589                                                  | (GIORGETTI <i>et al.</i> 2009; GREBER <i>et al.</i> 2007)     |
| NM_004426                                                                                                     | PHC1      | Polyhomeotic homolog 1                                           | (GIULIANO <i>et al.</i> 2005)                                 |
| NM_005407                                                                                                     | SALL2     | SAL2 like                                                        | (GIORGETTI <i>et al.</i> 2009)                                |
| NM_004427                                                                                                     | PHC2      | Polyhomeotic homolog 2                                           | (ISONO <i>et al.</i> 2005)                                    |
| NM_032805                                                                                                     | ZFP206    | Zinc finger protein 206 (ZSCAN10)                                | (WANG <i>et al.</i> 2007; YU <i>et al.</i> 2009)              |
| NM_003325                                                                                                     | HIRA      | HIR Histone Cell Cycle regulator                                 | (ZWAKA 2006)                                                  |
| BC098403                                                                                                      | ETV1      | ETS variant 1                                                    | (FOUSE <i>et al.</i> 2008; LOH <i>et al.</i> 2006)            |
| NM_006079                                                                                                     | CITED2    | Cbp/p300-interacting transactivator                              | (KRANC <i>et al.</i> 2003; KRANC <i>et al.</i> 2009)          |
| NM_006074                                                                                                     | TRIM22    | Tripartite motif-containing 22                                   | (GREBER <i>et al.</i> 2007)                                   |
| XM_929986                                                                                                     | LOC653441 | Similar to polyhomeotic 1-like                                   | Gene with sequence similarity to PHC1                         |
| <b>Cluster 22: A cluster of TFs control neural development in earlier differentiation of human stem cells</b> |           |                                                                  |                                                               |
| BC008687                                                                                                      | NEUROG1   | Neurogenin 1                                                     | (HIRABAYASHI <i>et al.</i> 2004)                              |
| NM_006161                                                                                                     | NEUROG1   | Neurogenin 1                                                     | (HIRABAYASHI <i>et al.</i> 2004)                              |
| NM_033178                                                                                                     | DUX4      | Double homeobox 4                                                | (BOSNAKOVSKI <i>et al.</i> 2009)                              |
| NM_006732                                                                                                     | FOSB      | FBJ oncogene homolog B                                           | (KELZ and NESTLER 2000)                                       |
| NM_003317                                                                                                     | TITF1     | NK2 homeobox 1                                                   | (GARCIA-BARCELO <i>et al.</i> 2007)                           |
| NM_002478                                                                                                     | MYOD1     | myogenic differentiation 1                                       | (DAUBAS <i>et al.</i> 2009; DAUBAS <i>et al.</i> 2000)        |
| NM_006192                                                                                                     | PAX1      | Paired box 1                                                     | (JOOSTEN <i>et al.</i> 2005)                                  |
| NM_002700                                                                                                     | POU4F3    | POU class 4 homeobox 3                                           | (VAHAVA <i>et al.</i> 1998)                                   |
| BC10493                                                                                                       | POU4F3    | POU class 4 homeobox 3                                           | (VAHAVA <i>et al.</i> 1998)                                   |
| <b>Cluster 17: A cluster of TFs control differentiation towards multiple directions in human stem cells</b>   |           |                                                                  |                                                               |
| NM_001002295                                                                                                  | GATA3     | GATA binding protein 3                                           | Trophectoderm (HOME <i>et al.</i> 2009)                       |
| NM_012258                                                                                                     | HEY1      | Hairy/enhancer-of-split related with YRPW motif 1                | Trophectoderm (XU 2006)                                       |
| NM_032638                                                                                                     | GATA2     | GATA binding protein 2                                           | Trophectoderm (MA <i>et al.</i> 1997)                         |
| NM_030379                                                                                                     | GLI2      | GLI family zinc finger 2                                         | Mesoderm (BUTTITA <i>et al.</i> 2003)                         |
| NM_017410                                                                                                     | HOXC13    | Homeobox C13                                                     | Ectoderm (GODWIN and CAPECCHI 1999)                           |
| NM_002202                                                                                                     | ISL1      | ISL LIM homeobox 1                                               | Mesoderm (CAI <i>et al.</i> 2003)                             |
| NM_005461                                                                                                     | MAFB      | v-maf musculoaponeurotic fibrosarcoma oncogene homolog B (avian) | Neural (STURGEON <i>et al.</i> )                              |
| NM_002449                                                                                                     | MSX2      | Msh homeobox 2                                                   | Mesoderm (BRUNELLI and COSSU 2005)                            |
| NM_175747                                                                                                     | OLIG3     | Oligodendrocyte transcription factor 3                           | Neural (FILIPPI <i>et al.</i> 2005)                           |
| NM_006099                                                                                                     | PIAS3     | Protein inhibitor of activated STAT, 3                           | Neural (ONISHI <i>et al.</i> 2009)                            |
| NM_019854                                                                                                     | PRMT8     | Protein arginine methyltransferase 8                             | Neural (LEE <i>et al.</i> 2005)                               |
| NM_030567                                                                                                     | PRR7      | Proline rich 7 (synaptic)                                        | (MURATA <i>et al.</i> 2005)                                   |
| NM_003068                                                                                                     | SNAI2     | Snail homolog 2 (Drosophila)                                     | Neural Crest (STEGMANN <i>et al.</i> 1999)                    |
| NM_031439                                                                                                     | SOX7      | SRY (sex determining region Y)-box 7                             | Endoderm (Parietal) (FUTAKI <i>et al.</i> 2004)               |
| NM_007129                                                                                                     | ZIC2      | Zic family member 2 (odd-paired homolog, Drosophila)             | Neural (ELMS <i>et al.</i> 2003)                              |

Original Table 2. Cluster 1, 2, 5, 7 and 19 identified from salt stress data of Arabidopsis roots containing rootgrowth and development (Nie et al 2011)

| Gene                                                                                          | Symbol    | Description                                                      | Evidence                                                 |
|-----------------------------------------------------------------------------------------------|-----------|------------------------------------------------------------------|----------------------------------------------------------|
| Cluster 1: A TF cluster controlling the root hair growth                                      |           |                                                                  |                                                          |
| AT5G58010                                                                                     | LRL3      | Roothairless1                                                    | (KARAS <i>et al.</i> 2009)                               |
| AT5G19790                                                                                     | RAP2.11   | Ethylene response factor controlling root growth                 | (JUNG <i>et al.</i> 2007)                                |
| AT1G27740                                                                                     | RSL4      | Postmitotic cell growth in root-hair cells                       | (YI <i>et al.</i> 2010)                                  |
| AT1G66470                                                                                     | RHD6      | Early root hair formation                                        | (MENAND <i>et al.</i> 2007; SINGH <i>et al.</i> 2008)    |
| AT5G25810                                                                                     | TINY      | ERF/AP2 TF control cell expansion in root                        | (WILSON <i>et al.</i> 1996)                              |
| AT2G28160                                                                                     | FRU       | Regulates iron uptake responses in outer cells of root           | (JAKOBY <i>et al.</i> 2004; YUAN <i>et al.</i> 2005)     |
| Cluster 2: A cluster of TFs control root cap development (stem cells of roots)                |           |                                                                  |                                                          |
| AT1G33280                                                                                     | BRN1      | BRN1, SMB control root cap maturation                            | (BENNETT <i>et al.</i> 2010)                             |
| AT4G10350                                                                                     | BRN2      | BRN2, SMB control root cap maturation                            | (BENNETT <i>et al.</i> 2010)                             |
| AT1G79580                                                                                     | SMB       | FEZ and SMB control root stem cells                              | (WILLEMSSEN <i>et al.</i> 2008)                          |
| AT5G39820                                                                                     | ANAC094   | Apical meristem protein, function unknown                        | (YI <i>et al.</i> 2010)                                  |
| AT1G26870                                                                                     | FEZ       | FEZ and SMB control root stem cells in cap                       | (WILLEMSSEN <i>et al.</i> 2008)                          |
| AT1G74500                                                                                     | TOM7      | Embryonic root initiation                                        | (SCHLERETH <i>et al.</i> 2010)                           |
| AT3G27010                                                                                     | TCP20     | Postembryonic cell division in root                              | (LI <i>et al.</i> 2005)                                  |
| AT2G30340                                                                                     | LBD13     | Expressed in cells at the adaxial base of lateral roots          | (SHUAI <i>et al.</i> 2002)                               |
| AT2G40470                                                                                     | LBD15     | Expressed in cells at the adaxial base of lateral roots          | (SHUAI <i>et al.</i> 2002)                               |
| AT1G51190                                                                                     | PLT2      | Control root stem cell activity near cap                         | (ZHOU <i>et al.</i> 2010)                                |
| AT1G66350                                                                                     | RGL1      | Root epidermal differentiation                                   | (GAN <i>et al.</i> 2007)                                 |
| AT2G37260                                                                                     | TTG2      | Differentiation of trichomes and root hairless cells             | (ISHIDA <i>et al.</i> 2007)                              |
| AT5G57420                                                                                     | IAA33     | IAA is involved in root development                              | (KARES <i>et al.</i> 1990; PETERSSON <i>et al.</i> 2009) |
| Cluster 5: A cluster of TFs control root vascular development, second wall growth development |           |                                                                  |                                                          |
| AT1G71930                                                                                     | VND7      | Regulates xylem vessel formation                                 | (KUBO <i>et al.</i> 2005)                                |
| AT5G12870                                                                                     | MYB46     | Target of SND1, control second wall biosynthesis                 | (ZHONG <i>et al.</i> 2007)                               |
| AT1G01780                                                                                     | LIM       | LIM domain-containing protein                                    |                                                          |
| AT1G12260                                                                                     | VND4      | Switches for protoxylem and metaxylem vessel formation           | (KUBO <i>et al.</i> 2005)                                |
| AT1G17950                                                                                     | MYB52     | Second wall growth                                               | (ZHONG <i>et al.</i> 2008)                               |
| AT1G63910                                                                                     | MYB103    | Second wall growth                                               | (ZHONG <i>et al.</i> 2008)                               |
| AT1G66230                                                                                     | MYB20     | Second wall growth                                               | (ZHONG <i>et al.</i> 2008)                               |
| AT1G68810                                                                                     | bHLH      | Root vascular initial                                            | (OHASHI-ITO and BERGMANN 2007)                           |
| AT1G73410                                                                                     | MYB54     | Second wall growth                                               | (ZHONG <i>et al.</i> 2008)                               |
| AT2G39830                                                                                     | DAR2      | DA-1 related, control organ size                                 | (LI <i>et al.</i> 2008)                                  |
| AT2G45420                                                                                     | LBD18     | Lateral root and tracheary element formation                     | (LEE <i>et al.</i> 2009)                                 |
| AT3G21270                                                                                     | ADO2      | Early stages of vascular development                             | (GARDINER <i>et al.</i> 2010)                            |
| AT4G00220                                                                                     | JLO       | A central regulator of auxin distribution and signaling in root  | (BUREAU <i>et al.</i> 2010)                              |
| AT4G28500                                                                                     | SND2      | Vascular cell differentiation                                    | (GRANT <i>et al.</i> 2010)                               |
| AT5G66610                                                                                     | DAR7      | DA-1 related, control organ size                                 | (LI <i>et al.</i> 2008)                                  |
| Cluster 7: A cluster of TFs that controlling root cell cycle & growth                         |           |                                                                  |                                                          |
| AT5G24330                                                                                     | AtXR6     | Cell cycle regulation of late G1 to S phase                      | (RAYNAUD <i>et al.</i> 2006)                             |
| AT3G01330                                                                                     | DEL3      | Cyclin D/retinoblastoma/E2F pathway                              | (SOZZANI <i>et al.</i> 2009)                             |
| AT2G22840                                                                                     | AtGRF1    | Growth factor expressed in root                                  | (KIM <i>et al.</i> 2003; KIM and KENDE 2004)             |
| AT2G36400                                                                                     | AtGRF3    | Growth factor expressed in root                                  | (KIM <i>et al.</i> 2003; KIM and KENDE 2004)             |
| AT4G37740                                                                                     | AtGRF2    | Growth factor expressed in root                                  | (KIM <i>et al.</i> 2003; KIM and KENDE 2004)             |
| AT3G50870                                                                                     | MNP       | GATA transcription factor                                        | (OHASHI 2006)                                            |
| AT1G34355                                                                                     | PS1       | Parallel spindle 1 involved in meiosis                           | (D'ERFURTH <i>et al.</i> 2008)                           |
| AT4G23800                                                                                     | HMG1/HMG2 | High mobile group 1, 2                                           | (MENGENS <i>et al.</i> 2002)                             |
| Cluster 19: A cluster of TFs control drought stress in response to ABA                        |           |                                                                  |                                                          |
| AT2G46270                                                                                     | GBF3      | induced by ABA under water deprivation                           | (SEHNKE <i>et al.</i> 2005)                              |
| AT3G19290                                                                                     | ABF4      | Regulate ABRE-dependent ABA signaling involved in drought stress | (YOSHIDA <i>et al.</i> 2010)                             |
| AT1G51140                                                                                     | bHLH      | Drought stress                                                   | (RIZHSKY <i>et al.</i> 2004)                             |
| AT1G52890                                                                                     | ANAC019   | Bind to drought-responsive cis-element in response to ABA        | (JIANG <i>et al.</i> 2009; TRAN <i>et al.</i> 2004)      |
| AT1G73730                                                                                     | EIL3      | Ethylene signaling                                               | (BINDER <i>et al.</i> 2007)                              |
| AT2G46680                                                                                     | ATHB7     | Growth regulator in response to ABA                              | (OLSSON <i>et al.</i> 2004)                              |

|           |        |                                                                  |                                                         |
|-----------|--------|------------------------------------------------------------------|---------------------------------------------------------|
| AT3G61890 | ATHB12 | Growth regulator in response to ABA                              | (OLSSON <i>et al.</i> 2004)                             |
| AT4G21440 | MYB102 | ABA-induced protein                                              | (LEONHARDT <i>et al.</i> 2004)                          |
| AT4G25480 | DREB1A | Drought stress genes responsive to ABA                           | (RIECHMANN <i>et al.</i> 2000) (LIU <i>et al.</i> 1998) |
| AT4G27410 | RD26   | Transcriptional activator in ABA-mediated dehydration response   | (TRAN <i>et al.</i> 2004)                               |
| AT4G34000 | ABF3   | Regulate ABRE-dependent ABA signaling involved in drought stress | (Yoshida <i>et al.</i> 2010)                            |
| AT5G47640 | NF-YB2 | NF-YB2 (NUCLEAR FACTOR Y, SUBUNIT B2); transcription factor      | (KUMIMOTO <i>et al.</i> 2011)                           |
| AT2G18550 | HB-2   | DNA binding / transcription factor                               | (SON <i>et al.</i> 2005)                                |
| AT1G77200 | DREBA4 | DREB subfamily A-4 of ERF/AP2 transcription factor               | (RIECHMANN <i>et al.</i> 2000)                          |

- AASEN, T., A. RAYA, M. J. BARRERO, E. GARRETA, A. CONSIGLIO *et al.*, 2008 Efficient and rapid generation of induced pluripotent stem cells from human keratinocytes. *Nat Biotechnol* **26**: 1276-1284.
- BENNETT, T., A. VAN DEN TOORN, G. F. SANCHEZ-PEREZ, A. CAMPILHO, V. WILLEMSSEN *et al.*, 2010 SOMBRERO, BEARSKIN1, and BEARSKIN2 regulate root cap maturation in Arabidopsis. *Plant Cell* **22**: 640-654.
- BINDER, B. M., J. M. WALKER, J. M. GAGNE, T. J. EMBORG, G. HEMMANN *et al.*, 2007 The Arabidopsis EIN3 binding F-Box proteins EBF1 and EBF2 have distinct but overlapping roles in ethylene signaling. *Plant Cell* **19**: 509-523.
- BOSNAKOVSKI, D., R. S. DAUGHTERS, Z. XU, J. M. SLACK and M. KYBA, 2009 Biphasic myopathic phenotype of mouse DUX, an ORF within conserved FSHD-related repeats. *PLoS One* **4**: e7003.
- BOYER, L. A., T. I. LEE, M. F. COLE, S. E. JOHNSTONE, S. S. LEVINE *et al.*, 2005 Core transcriptional regulatory circuitry in human embryonic stem cells. *Cell* **122**: 947-956.
- BRUNELLI, S., and G. COSSU, 2005 A role for MSX2 and necdin in smooth muscle differentiation of mesoangioblasts and other mesoderm progenitor cells. *Trends Cardiovasc Med* **15**: 96-100.
- BUREAU, M., M. I. RAST, J. ILLMER and R. SIMON, 2010 JAGGED LATERAL ORGAN (JLO) controls auxin dependent patterning during development of the Arabidopsis embryo and root. *Plant Mol Biol* **74**: 479-491.
- BUTTITTA, L., R. MO, C. C. HUI and C. M. FAN, 2003 Interplays of Gli2 and Gli3 and their requirement in mediating Shh-dependent sclerotome induction. *Development* **130**: 6233-6243.
- CAI, C. L., X. LIANG, Y. SHI, P. H. CHU, S. L. PFAFF *et al.*, 2003 Isl1 identifies a cardiac progenitor population that proliferates prior to differentiation and contributes a majority of cells to the heart. *Dev Cell* **5**: 877-889.
- D'ERFURTH, I., S. JOLIVET, N. FROGER, O. CATRICE, M. NOVATCHKOVA *et al.*, 2008 Mutations in AtPS1 (Arabidopsis thaliana parallel spindle 1) lead to the production of diploid pollen grains. *PLoS Genet* **4**: e1000274.
- DAUBAS, P., C. G. CRIST, L. BAJARD, F. RELAX, E. PECNARD *et al.*, 2009 The regulatory mechanisms that underlie inappropriate transcription of the myogenic determination gene Myf5 in the central nervous system. *Dev Biol* **327**: 71-82.
- DAUBAS, P., S. TAJBAKHS, J. HADCHOUËL, M. PRIMIG and M. BUCKINGHAM, 2000 Myf5 is a novel early axonal marker in the mouse brain and is subjected to post-transcriptional regulation in neurons. *Development* **127**: 319-331.
- ELMS, P., P. SIGGERS, D. NAPPER, A. GREENFIELD and R. ARKELL, 2003 Zic2 is required for neural crest formation and hindbrain patterning during mouse development. *Dev Biol* **264**: 391-406.
- FILIPPI, A., N. TISO, G. DEFLORIAN, E. ZECCHIN, M. BORTOLUSSI *et al.*, 2005 The basic helix-loop-helix olig3 establishes the neural plate boundary of the trunk and is necessary for development of the dorsal spinal cord. *Proc Natl Acad Sci U S A* **102**: 4377-4382.
- FOUSE, S. D., Y. SHEN, M. PELLEGRINI, S. COLE, A. MEISSNER *et al.*, 2008 Promoter CpG methylation contributes to ES cell gene regulation in parallel with Oct4/Nanog, PcG complex, and histone H3 K4/K27 trimethylation. *Cell Stem Cell* **2**: 160-169.

- FUTAKI, S., Y. HAYASHI, T. EMOTO, C. N. WEBER and K. SEKIGUCHI, 2004 Sox7 plays crucial roles in parietal endoderm differentiation in F9 embryonal carcinoma cells through regulating Gata-4 and Gata-6 expression. *Mol Cell Biol* **24**: 10492-10503.
- GAN, Y., H. YU, J. PENG and P. BROUN, 2007 Genetic and molecular regulation by DELLA proteins of trichome development in Arabidopsis. *Plant Physiol* **145**: 1031-1042.
- GARCIA-BARCELO, M. M., D. K. LAU, E. S. NGAN, T. Y. LEON, T. T. LIU *et al.*, 2007 Evaluation of the thyroid transcription factor-1 gene (TTF1) as a Hirschsprung's disease locus. *Ann Hum Genet* **71**: 746-754.
- GARDINER, J., I. SHERR and E. SCARPELLA, 2010 Expression of DOF genes identifies early stages of vascular development in Arabidopsis leaves. *Int J Dev Biol* **54**: 1389-1396.
- GIORGETTI, A., N. MONTERRAT, T. AASEN, F. GONZALEZ, I. RODRIGUEZ-PIZA *et al.*, 2009 Generation of induced pluripotent stem cells from human cord blood using OCT4 and SOX2. *Cell Stem Cell* **5**: 353-357.
- GIULIANO, C. J., J. S. KERLEY-HAMILTON, T. BEE, S. J. FREEMANTLE, R. MANICKARATNAM *et al.*, 2005 Retinoic acid represses a cassette of candidate pluripotency chromosome 12p genes during induced loss of human embryonal carcinoma tumorigenicity. *Biochim Biophys Acta* **1731**: 48-56.
- GODWIN, A. R., and M. R. CAPECCHI, 1999 Hair defects in Hoxc13 mutant mice. *J Invest Dermatol Symp Proc* **4**: 244-247.
- GOPALAKRISHNAN, S., B. O. VAN EMBURGH, J. SHAN, Z. SU, C. R. FIELDS *et al.*, 2009 A novel DNMT3B splice variant expressed in tumor and pluripotent cells modulates genomic DNA methylation patterns and displays altered DNA binding. *Mol Cancer Res* **7**: 1622-1634.
- GRANT, E. H., T. FUJINO, E. P. BEERS and A. M. BRUNNER, 2010 Characterization of NAC domain transcription factors implicated in control of vascular cell differentiation in Arabidopsis and Populus. *Planta* **232**: 337-352.
- GREBER, B., H. LEHRACH and J. ADJAYE, 2007 Silencing of core transcription factors in human EC cells highlights the importance of autocrine FGF signaling for self-renewal. *BMC Dev Biol* **7**: 46.
- HIRABAYASHI, Y., Y. ITOH, H. TABATA, K. NAKAJIMA, T. AKIYAMA *et al.*, 2004 The Wnt/beta-catenin pathway directs neuronal differentiation of cortical neural precursor cells. *Development* **131**: 2791-2801.
- HOME, P., S. RAY, D. DUTTA, I. BRONSHTEYN, M. LARSON *et al.*, 2009 GATA3 is selectively expressed in the trophectoderm of peri-implantation embryo and directly regulates Cdx2 gene expression. *J Biol Chem* **284**: 28729-28737.
- ISHIDA, T., S. HATTORI, R. SANO, K. INOUE, Y. SHIRANO *et al.*, 2007 Arabidopsis TRANSPARENT TESTA GLABRA2 is directly regulated by R2R3 MYB transcription factors and is involved in regulation of GLABRA2 transcription in epidermal differentiation. *Plant Cell* **19**: 2531-2543.
- ISONO, K., Y. FUJIMURA, J. SHINGA, M. YAMAKI, O. W. J *et al.*, 2005 Mammalian polyhomeotic homologues Phc2 and Phc1 act in synergy to mediate polycomb repression of Hox genes. *Mol Cell Biol* **25**: 6694-6706.
- JAKOBY, M., H. Y. WANG, W. REIDT, B. WEISSHAAR and P. BAUER, 2004 FRU (BHLH029) is required for induction of iron mobilization genes in Arabidopsis thaliana. *FEBS Lett* **577**: 528-534.
- JIANG, H., H. LI, Q. BU and C. LI, 2009 The RHA2a-interacting proteins ANAC019 and ANAC055 may play a dual role in regulating ABA response and jasmonate response. *Plant Signal Behav* **4**: 464-466.
- JOOSTEN, P. H., E. J. VAN ZOELLEN and C. MURRE, 2005 Pax1/E2a double-mutant mice develop non-lethal neural tube defects that resemble human malformations. *Transgenic Res* **14**: 983-987.
- JUNG, J., S. Y. WON, S. C. SUH, H. KIM, R. WING *et al.*, 2007 The barley ERF-type transcription factor HvRAF confers enhanced pathogen resistance and salt tolerance in Arabidopsis. *Planta* **225**: 575-588.
- KARAS, B., L. AMYOT, C. JOHANSEN, S. SATO, S. TABATA *et al.*, 2009 Conservation of lotus and Arabidopsis basic helix-loop-helix proteins reveals new players in root hair development. *Plant Physiol* **151**: 1175-1185.
- KARES, C., E. PRINSEN, H. VAN ONCKELEN and L. OTTEN, 1990 IAA synthesis and root induction with iaa genes under heat shock promoter control. *Plant Mol Biol* **15**: 225-236.
- KELZ, M. B., and E. J. NESTLER, 2000 deltaFosB: a molecular switch underlying long-term neural plasticity. *Curr Opin Neurol* **13**: 715-720.

- KIM, J. H., D. CHOI and H. KENDE, 2003 The AtGRF family of putative transcription factors is involved in leaf and cotyledon growth in Arabidopsis. *Plant J* **36**: 94-104.
- KIM, J. H., and H. KENDE, 2004 A transcriptional coactivator, AtGIF1, is involved in regulating leaf growth and morphology in Arabidopsis. *Proc Natl Acad Sci U S A* **101**: 13374-13379.
- KRANC, K. R., S. D. BAMFORTH, J. BRAGANCA, C. NORBURY, M. VAN LOHUIZEN *et al.*, 2003 Transcriptional coactivator Cited2 induces Bmi1 and Mel18 and controls fibroblast proliferation via Ink4a/ARF. *Mol Cell Biol* **23**: 7658-7666.
- KRANC, K. R., H. SCHEPERS, N. P. RODRIGUES, S. BAMFORTH, E. VILLADSEN *et al.*, 2009 Cited2 is an essential regulator of adult hematopoietic stem cells. *Cell Stem Cell* **5**: 659-665.
- KUBO, M., M. UDAGAWA, N. NISHIKUBO, G. HORIGUCHI, M. YAMAGUCHI *et al.*, 2005 Transcription switches for protoxylem and metaxylem vessel formation. *Genes Dev* **19**: 1855-1860.
- KUMIMOTO, R., C. SIRIWARDANA, K. GAYLER and J. H. I. RISINGER, B., 2011 The Roles of NF-Y Transcription Factors in ABA Responses. 22nd International Conference on Arabidopsis Research.
- LEE, H. W., N. Y. KIM, D. J. LEE and J. KIM, 2009 LBD18/ASL20 regulates lateral root formation in combination with LBD16/ASL18 downstream of ARF7 and ARF19 in Arabidopsis. *Plant Physiol* **151**: 1377-1389.
- LEE, J., J. SAYEGH, J. DANIEL, S. CLARKE and M. T. BEDFORD, 2005 PRMT8, a new membrane-bound tissue-specific member of the protein arginine methyltransferase family. *J Biol Chem* **280**: 32890-32896.
- LEONHARDT, N., J. M. KWAK, N. ROBERT, D. WANER, G. LEONHARDT *et al.*, 2004 Microarray expression analyses of Arabidopsis guard cells and isolation of a recessive abscisic acid hypersensitive protein phosphatase 2C mutant. *Plant Cell* **16**: 596-615.
- LI, C., T. POTUSCHAK, A. COLON-CARMONA, R. A. GUTIERREZ and P. DOERNER, 2005 Arabidopsis TCP20 links regulation of growth and cell division control pathways. *Proc Natl Acad Sci U S A* **102**: 12978-12983.
- LI, Y., L. ZHENG, F. CORKE, C. SMITH and M. W. BEVAN, 2008 Control of final seed and organ size by the DA1 gene family in Arabidopsis thaliana. *Genes Dev* **22**: 1331-1336.
- LIU, Q., M. KASUGA, Y. SAKUMA, H. ABE, S. MIURA *et al.*, 1998 Two transcription factors, DREB1 and DREB2, with an EREBP/AP2 DNA binding domain separate two cellular signal transduction pathways in drought- and low-temperature-responsive gene expression, respectively, in Arabidopsis. *Plant Cell* **10**: 1391-1406.
- LOH, Y. H., Q. WU, J. L. CHEW, V. B. VEGA, W. ZHANG *et al.*, 2006 The Oct4 and Nanog transcription network regulates pluripotency in mouse embryonic stem cells. *Nat Genet* **38**: 431-440.
- MA, G. T., M. E. ROTH, J. C. GROSKOPF, F. Y. TSAI, S. H. ORKIN *et al.*, 1997 GATA-2 and GATA-3 regulate trophoblast-specific gene expression in vivo. *Development* **124**: 907-914.
- MENAND, B., K. YI, S. JOUANNIC, L. HOFFMANN, E. RYAN *et al.*, 2007 An ancient mechanism controls the development of cells with a rooting function in land plants. *Science* **316**: 1477-1480.
- MENGES, M., L. HENNIG, W. GRUISSEM and J. A. MURRAY, 2002 Cell cycle-regulated gene expression in Arabidopsis. *J Biol Chem* **277**: 41987-42002.
- MONK, M., M. HITCHINS and S. HAWES, 2008 Differential expression of the embryo/cancer gene ECSA(DPPA2), the cancer/testis gene BORIS and the pluripotency structural gene OCT4, in human preimplantation development. *Mol Hum Reprod* **14**: 347-355.
- MURATA, Y., T. DOI, H. TANIGUCHI and Y. FUJIYOSHI, 2005 Proteomic analysis revealed a novel synaptic proline-rich membrane protein (PRR7) associated with PSD-95 and NMDA receptor. *Biochem Biophys Res Commun* **327**: 183-191.
- OHASHI, K., 2006 [HANABA TARANU, a GATA transcription factor which affects shoot apical meristem development]. *Seikagaku* **78**: 888-891.
- OHASHI-ITO, K., and D. C. BERGMANN, 2007 Regulation of the Arabidopsis root vascular initial population by LONESOME HIGHWAY. *Development* **134**: 2959-2968.
- OLSSON, A. S., P. ENGSTROM and E. SODERMAN, 2004 The homeobox genes ATHB12 and ATHB7 encode potential regulators of growth in response to water deficit in Arabidopsis. *Plant Mol Biol* **55**: 663-677.
- ONISHI, A., G. H. PENG, C. HSU, U. ALEXIS, S. CHEN *et al.*, 2009 Pias3-dependent SUMOylation directs rod photoreceptor development. *Neuron* **61**: 234-246.

- PETERSSON, S. V., A. I. JOHANSSON, M. KOWALCZYK, A. MAKOVEYCHUK, J. Y. WANG *et al.*, 2009 An auxin gradient and maximum in the Arabidopsis root apex shown by high-resolution cell-specific analysis of IAA distribution and synthesis. *Plant Cell* **21**: 1659-1668.
- RAYNAUD, C., R. SOZZANI, N. GLAB, S. DOMENICHINI, C. PERENNES *et al.*, 2006 Two cell-cycle regulated SET-domain proteins interact with proliferating cell nuclear antigen (PCNA) in Arabidopsis. *Plant J* **47**: 395-407.
- RIECHMANN, J. L., J. HEARD, G. MARTIN, L. REUBER, C. JIANG *et al.*, 2000 Arabidopsis transcription factors: genome-wide comparative analysis among eukaryotes. *Science* **290**: 2105-2110.
- RIZHSKY, L., H. LIANG, J. SHUMAN, V. SHULAEV, S. DAVLETOVA *et al.*, 2004 When defense pathways collide. The response of Arabidopsis to a combination of drought and heat stress. *Plant Physiol* **134**: 1683-1696.
- SCHLERETH, A., B. MOLLER, W. LIU, M. KIENTZ, J. FLIPSE *et al.*, 2010 MONOPTEROS controls embryonic root initiation by regulating a mobile transcription factor. *Nature* **464**: 913-916.
- SEHNKE, P. C., B. J. LAUGHNER, C. R. LYERLY LINEBARGER, W. B. GURLEY and R. J. FERL, 2005 Identification and characterization of GIP1, an Arabidopsis thaliana protein that enhances the DNA binding affinity and reduces the oligomeric state of G-box binding factors. *Cell Res* **15**: 567-575.
- SHUAI, B., C. G. REYNAGA-PENA and P. S. SPRINGER, 2002 The lateral organ boundaries gene defines a novel, plant-specific gene family. *Plant Physiol* **129**: 747-761.
- SINGH, S. K., U. FISCHER, M. SINGH, M. GREBE and A. MARCHANT, 2008 Insight into the early steps of root hair formation revealed by the procuste1 cellulose synthase mutant of Arabidopsis thaliana. *BMC Plant Biol* **8**: 57.
- SON, O., H. Y. CHO, M. R. KIM, H. LEE, M. S. LEE *et al.*, 2005 Induction of a homeodomain-leucine zipper gene by auxin is inhibited by cytokinin in Arabidopsis roots. *Biochem Biophys Res Commun* **326**: 203-209.
- SOZZANI, R., C. MAGGIO, R. GIORDO, E. UMANA, J. T. ASCENCIO-IBAÑEZ *et al.*, 2009 The E2FD/DEL2 factor is a component of a regulatory network controlling cell proliferation and development in Arabidopsis. *Plant Molecular Biology* **72**: 381-395.
- STEGMANN, K., J. BOECKER, C. KOSAN, A. ERMERT, J. KUNZ *et al.*, 1999 Human transcription factor SLUG: mutation analysis in patients with neural tube defects and identification of a missense mutation (D119E) in the Slug subfamily-defining region. *Mutat Res* **406**: 63-69.
- STURGEON, K., T. KANEKO, M. BIEMANN, A. GAUTHIER, K. CHAWENGSAKSOPHAK *et al.*, Cdx1 refines positional identity of the vertebrate hindbrain by directly repressing Mafk expression. *Development* **138**: 65-74.
- TRAN, L. S., K. NAKASHIMA, Y. SAKUMA, S. D. SIMPSON, Y. FUJITA *et al.*, 2004 Isolation and functional analysis of Arabidopsis stress-inducible NAC transcription factors that bind to a drought-responsive cis-element in the early responsive to dehydration stress 1 promoter. *Plant Cell* **16**: 2481-2498.
- VAHAVA, O., R. MORELL, E. D. LYNCH, S. WEISS, M. E. KAGAN *et al.*, 1998 Mutation in transcription factor POU4F3 associated with inherited progressive hearing loss in humans. *Science* **279**: 1950-1954.
- WANG, Z. X., J. L. KUEH, C. H. TEH, M. ROSSBACH, L. LIM *et al.*, 2007 Zfp206 is a transcription factor that controls pluripotency of embryonic stem cells. *Stem Cells* **25**: 2173-2182.
- WILLEMSSEN, V., M. BAUCH, T. BENNETT, A. CAMPILHO, H. WOLKENFELT *et al.*, 2008 The NAC domain transcription factors FEZ and SOMBRERO control the orientation of cell division plane in Arabidopsis root stem cells. *Dev Cell* **15**: 913-922.
- WILSON, K., D. LONG, J. SWINBURNE and G. COUPLAND, 1996 A Dissociation insertion causes a semidominant mutation that increases expression of TINY, an Arabidopsis gene related to APETALA2. *Plant Cell* **8**: 659-671.
- XU, R. H., 2006 In vitro induction of trophoblast from human embryonic stem cells. *Methods Mol Med* **121**: 189-202.
- YI, K., B. MENAND, E. BELL and L. DOLAN, 2010 A basic helix-loop-helix transcription factor controls cell growth and size in root hairs. *Nat Genet* **42**: 264-267.
- YOSHIDA, T., Y. FUJITA, H. SAYAMA, S. KIDOKORO, K. MARUYAMA *et al.*, 2010 AREB1, AREB2, and ABF3 are master transcription factors that cooperatively regulate ABRE-dependent ABA

- signaling involved in drought stress tolerance and require ABA for full activation. *Plant J* **61**: 672-685.
- YU, H. B., G. KUNARSO, F. H. HONG and L. W. STANTON, 2009 Zfp206, Oct4, and Sox2 are integrated components of a transcriptional regulatory network in embryonic stem cells. *J Biol Chem* **284**: 31327-31335.
- YUAN, Y. X., J. ZHANG, D. W. WANG and H. Q. LING, 2005 AtbHLH29 of *Arabidopsis thaliana* is a functional ortholog of tomato FER involved in controlling iron acquisition in strategy I plants. *Cell Res* **15**: 613-621.
- ZHONG, R., C. LEE, J. ZHOU, R. L. MCCARTHY and Z. H. YE, 2008 A battery of transcription factors involved in the regulation of secondary cell wall biosynthesis in *Arabidopsis*. *Plant Cell* **20**: 2763-2782.
- ZHONG, R., E. A. RICHARDSON and Z. H. YE, 2007 The MYB46 transcription factor is a direct target of SND1 and regulates secondary wall biosynthesis in *Arabidopsis*. *Plant Cell* **19**: 2776-2792.
- ZHOU, W., L. WEI, J. XU, Q. ZHAI, H. JIANG *et al.*, 2010 *Arabidopsis* Tyrosylprotein sulfotransferase acts in the auxin/PLETHORA pathway in regulating postembryonic maintenance of the root stem cell niche. *Plant Cell* **22**: 3692-3709.
- ZWAKA, T. P., 2006 Breathing chromatin in pluripotent stem cells. *Dev Cell* **10**: 1-2.
